# Supplementary material for: A universal reporter cell line for bioactivity evaluation of engineered cytokine products
Source: bioRxiv or medRxiv preprint supplement (doi:10.1101/739987), 2019-12-02
Supplement: Supplementary file [file media-1.pdf]

**Supplementary Data:**

**A universal reporter cell line for bioactivity evaluation of engineered cytokine products**

Jacqueline Mock, Christian Pellegrino, Dario Neri\*

Department of Chemistry and Applied Biosciences, Swiss Federal Institute of Technology (ETH Zürich), Vladimir-Prelog-Weg 4, CH-8093 Zürich (Switzerland)

\*) Corresponding Author

Tel: +41-44-6337401

e-mail: [neri@pharma.ethz.ch](mailto:neri@pharma.ethz.ch)

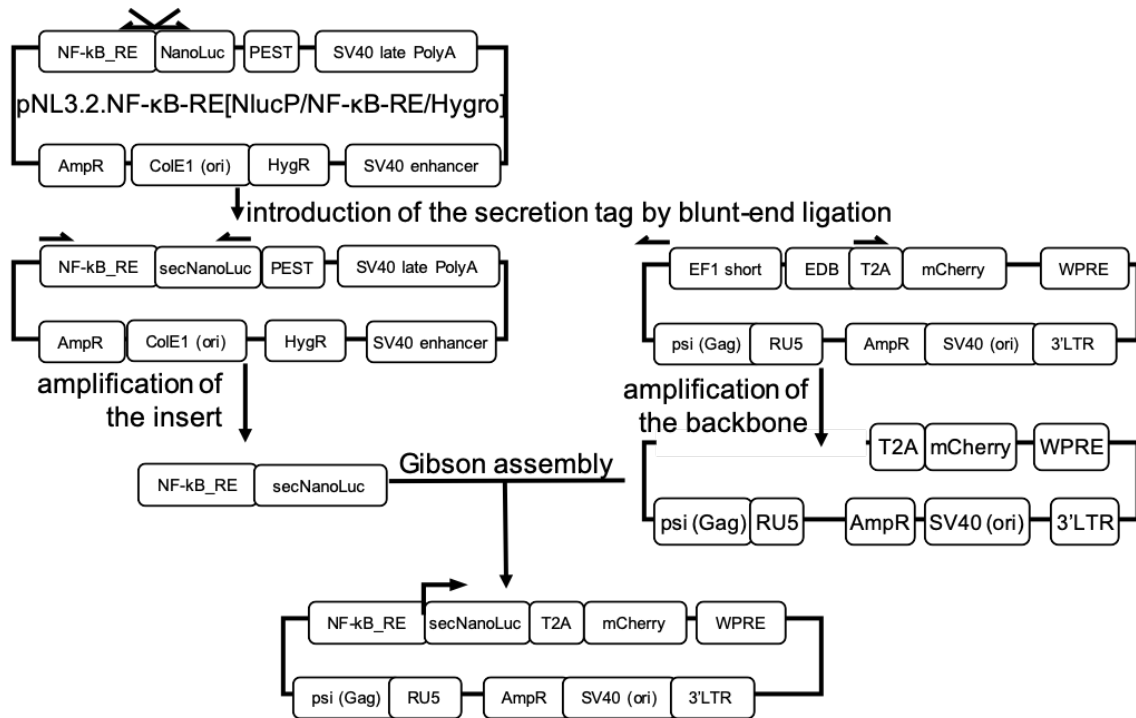

### NF-κB\_RE-minimalPromoter-hIL6-secretionSignal-Nanoluc-T2A-mCherry

GGGAATTTCCGGGGACTTTCCGGGAATTTCCGGGGACTTTCCGGGAATTTCC-AGATCTGG  
 CCTCGGCGGCCAAGCTTAGACACT-AGAGGGTATATAATGGAAGCTCGACTTCCAG-CTTG  
 GCAATCCGGTACTGTTGGTAAAGCCACC-ATGAACTCCTTCTCCACAAGCGCCTTCGGTCC  
 AGTTGCCTTCTCCCTGGGCCTGCTCCTGGTGTTCCTGCTGCCTTCCCTGCCCA-GTCTT  
 CACACTCGAAGATTTTCGTTGGGGACTGGCGACAGACAGCCGGCTACAACCTGGACCAAGTC  
 CTTGAACAGGGAGGTGTGTCCAGTTTGTTCAGAATCTCGGGGTGTCCGTAACCTCCGATCC  
 AAAGGATTGTCTGAGCGGTGAAAATGGGCTGAAGATCGACATCCATGTATCATCCCGTA  
 TGAAGGTCTGAGCGGCGACCAAATGGGCCAGATCGAAAAAATTTTAAAGGTGGTGTACCCT  
 GTGGATGATCATCACTTTAAGGTGATCCTGCACTATGGCACACTGGTAATCGACGGGGTTA  
 CGCCGAACATGATCGACTATTTTCGGACGGCCGTATGAAGGCATCGCCGTGTTTCGACGGCAA  
 AAAGATCACTGTAACAGGGACCCTGTGGAACGGCAACAAAATTAATCGACGAGCGCCTGATC  
 AACCCCGACGGCTCCCTGCTGTTCCGAGTAACCATCAACGGAGTGACCGGCTGGCGGCTGT  
 GCGAACGCATTCTGGCG-GAGGGCAGAGGAAGTCTTCTAACATGCGGTGACGTGGAGGAGA  
 ATCCCGGCCCT-ATGGTGAGCAAGGGCGAGGAGGATAACATGGCCATCATCAAGGAGTTCA  
 TGCGCTTCAAGGTGCACATGGAGGGCTCCGTGAACGGCCACGAGTTCGAGATCGAGGGCGA  
 GGGCGAGGGCCGCCCTACGAGGGCACCCAGACCGCCAAGCTGAAGGTGACCAAGGGTGGC  
 CCCCTGCCCTTCGCCTGGGACATCCTGTCCCCTCAGTTCATGTACGGCTCCAAGGCCTACG  
 TGAAGCACCCCGCCGACATCCCCGACTACTTGAAGCTGTCCCTCCCCGAGGGCTTCAAGTG  
 GGAGCGGTGATGAACTTCGAGGACGGCGGCGTGGTGACCGTGACCCAGGACTCCTCCCTG  
 CAGGACGGCGAGTTTATCTACAAGGTGAAGCTGCGCGGCACCAACTTCCCCTCCGACGGCC  
 CCGTAATGCAGAAGAAGACCATGGGCTGGGAGGCCTCCTCCGAGCGGATGTACCCCGAGGA  
 CGGCGCCCTGAAGGGCGAGATCAAGCAGAGGCTGAAGCTGAAGGACGGCGGCCACTACGAC  
 GCTGAGGTCAAGACCACCTACAAGGCCAAGAAGCCCCTGCAGCTGCCCGGCGCCTACAACG  
 TCAACATCAAGTTGGACATCACCTCCCACAACGAGGACTACACCATCGTGAACAGTACGA  
 ACGCGCCGAGGGCCGCCACTCCACCGCGGCATGGACGAGCTGTACAAGTAA

**Supplementary Figure S1:** cloning strategy and sequence of the reporter vector a) outline of the cloning strategy b) sequence of the reporter vector, primer binding sites are underlined

- a **F8(dDb)-4-1BBL**: F8\_VH-linker-F8\_VL-linker-4-1BBL-linker-4-1BBL-linker-4-1BBL  
EVQLLESGGGLVQPGGSLRLSCAASGFTFSLFTMSWVRQAPGKGLEWVSAISGSGGSTYYADSVK  
GRFTISRDNKNTLYLQMNSLRAEDTAVYYCAKSTHLYLFDYWGGGTLVTVSS-GGSGG-EIVLTQS  
PGTLSLSPGERATLSCRASQSVSMPFLAWYQQKPGQAPRLLIYGASSRATGIPDRFSGSGSGTDFTL  
TISRLEPEDFAVYYCQQMRGRPPTFGQGTKVEIK-SSSSGSSSSGSSSSG-ATTQQGSPVFAKLLAKN  
QASLCNTTLNWSQDGAGSSYLSQGLRYEEDKKELVVDSPGLYYVFLELKLSPFTTNTGHKVQGW  
VSLVLQAKPQVDDFDNLALTVELFPCSMENKLVDRSWSQLLLLKAGHRLSVGLRAYLHGAQDAYR  
DWELSYPNNTTSFGLFLVKPDNPWE-G-ATTQQGSPVFAKLLAKNQASLCNTTLNWSQDGAGSSY  
LSQGLRYEEDKKELVVDSPGLYYVFLELKLSPFTTNTGHKVQGWVSLVLQAKPQVDDFDNLALTVE  
LFPCSMENKLVDRSWSQLLLLKAGHRLSVGLRAYLHGAQDAYRDWELSYPNNTTSFGLFLVKPDNP  
WE-G-ATTQQGSPVFAKLLAKNQASLCNTTLNWSQDGAGSSYLSQGLRYEEDKKELVVDSPGLY  
YVFLELKLSPFTTNTGHKVQGWVSLVLQAKPQVDDFDNLALTVELFPCSMENKLVDRSWSQLLLL  
AGHRLSVGLRAYLHGAQDAYRDWELSYPNNTTSFGLFLVKPDNPWE
- b **F8(scFv)-4-1BBL**: F8\_VH-linker-F8\_VL-linker-4-1BBL  
EVQLLESGGGLVQPGGSLRLSCAASGFTFSLFTMSWVRQAPGKGLEWVSAISGSGGSTYYADSVK  
GRFTISRDNKNTLYLQMNSLRAEDTAVYYCAKSTHLYLFDYWGGGTLVTVSS-GGGGSGGGGSG  
GGG-EIVLTQSPGTLSLSPGERATLSCRASQSVSMPFLAWYQQKPGQAPRLLIYGASSRATGIPDRF  
SGSGSGTDFTLTISRLEPEDFAVYYCQQMRGRPPTFGQGTKVEIK-SSSSGSSSSGSSSS-GATTQQG  
SPVFAKLLAKNQASLCNTTLNWSQDGAGSSYLSQGLRYEEDKKELVVDSPGLYYVFLELKLSPFTT  
NTGHKVQGWVSLVLQAKPQVDDFDNLALTVELFPCSMENKLVDRSWSQLLLLKAGHRLSVGLRA  
LHGAQDAYRDWELSYPNNTTSFGLFLVKPDNPWE
- c **F8(dDb)-GITRL**: F8\_VH-linker-F8\_VL-linker-GITRL-linker-GITRL-linker-GITRL  
EVQLLESGGGLVQPGGSLRLSCAASGFTFSLFTMSWVRQAPGKGLEWVSAISGSGGSTYYADSVK  
GRFTISRDNKNTLYLQMNSLRAEDTAVYYCAKSTHLYLFDYWGGGTLVTVSS-GGSGG-EIVLTQS  
PGTLSLSPGERATLSCRASQSVSMPFLAWYQQKPGQAPRLLIYGASSRATGIPDRFSGSGSGTDFTL  
TISRLEPEDFAVYYCQQMRGRPPTFGQGTKVEIK-SSSSGSSSSGSSSSG-PTAIESCMVKFELSSSKW  
HMTSPKPHCVNTTSDGKILQSGTYLIYGVIPVDKKYIKDNAPFVVQIYKKNVQLQTLMNDFQIL  
PIGGVYELHAGDNIYLFNSKDHIQKNNTYWGIIIMPDLPGGGSGGG-PTAIESCMVKFELSSSKW  
HMTSPKPHCVNTTSDGKILQSGTYLIYGVIPVDKKYIKDNAPFVVQIYKKNVQLQTLMNDFQIL  
PIGGVYELHAGDNIYLFNSKDHIQKNNTYWGIIIMPDLPGGGSGGG-PTAIESCMVKFELSSSKW  
HMTSPKPHCVNTTSDGKILQSGTYLIYGVIPVDKKYIKDNAPFVVQIYKKNVQLQTLMNDFQIL  
PIGGVYELHAGDNIYLFNSKDHIQKNNTYWGIIIMPDLPGGGSGGG-PTAIESCMVKFELSSSKW
- d **F8(scFv)-GITRL**: F8\_VH-linker-F8\_VL-linker-GITRL  
EVQLLESGGGLVQPGGSLRLSCAASGFTFSLFTMSWVRQAPGKGLEWVSAISGSGGSTYYADSVK  
GRFTISRDNKNTLYLQMNSLRAEDTAVYYCAKSTHLYLFDYWGGGTLVTVSS-GGGGSGGGGSG  
GGG-EIVLTQSPGTLSLSPGERATLSCRASQSVSMPFLAWYQQKPGQAPRLLIYGASSRATGIPDRF  
SGSGSGTDFTLTISRLEPEDFAVYYCQQMRGRPPTFGQGTKVEIK-SSSSGSSSSGSSSS-PTAIESCM  
VKFELSSSKWHMTSPKPHCVNTTSDGKILQSGTYLIYGVIPVDKKYIKDNAPFVVQIYKKNVQL  
QTLMNDFQILPIGGVYELHAGDNIYLFNSKDHIQKNNTYWGIIIMPDLPGGGSGGG-PTAIESCM  
VKFELSSSKWHMTSPKPHCVNTTSDGKILQSGTYLIYGVIPVDKKYIKDNAPFVVQIYKKNVQL  
QTLMNDFQILPIGGVYELHAGDNIYLFNSKDHIQKNNTYWGIIIMPDLPGGGSGGG-PTAIESCM  
VKFELSSSKWHMTSPKPHCVNTTSDGKILQSGTYLIYGVIPVDKKYIKDNAPFVVQIYKKNVQL  
QTLMNDFQILPIGGVYELHAGDNIYLFNSKDHIQKNNTYWGIIIMPDLPGGGSGGG-PTAIESCM
- e **F8(scDb)-CD154**: F8\_VH-linker-F8\_VL-linker-F8\_VH-linker-F8\_VL-linker-CD154-linker-  
CD154-linker-CD154  
EVQLLESGGGLVQPGGSLRLSCAASGFTFSLFTMSWVRQAPGKGLEWVSAISGSGGSTYYADSVK  
GRFTISRDNKNTLYLQMNSLRAEDTAVYYCAKSTHLYLFDYWGGGTLVTVSS-GGSGG-EIVLTQS  
PGTLSLSPGERATLSCRASQSVSMPFLAWYQQKPGQAPRLLIYGASSRATGIPDRFSGSGSGTDFTL  
TISRLEPEDFAVYYCQQMRGRPPTFGQGTKVEIK-GGGGSGGGGSGGGG-EVQLLESGGGLVQPG  
GGSLRLSCAASGFTFSLFTMSWVRQAPGKGLEWVSAISGSGGSTYYADSVKGRFTISRDNKNTLY

LQMNSLRAEDTAVYYCAKSTHLYLFDYWGGTLVTVSS-*GGSGG*-EIVLTQSPGTLSPGERATLS  
CRASQSVSMPFLAWYQQKPGQAPRLIYGASSRATGIPDRFSGSGSGTDFTLTISRLEPEDFAVYYC  
QQMRGRPPTFGQGTKVEIK-*SSSSGSSSSGSSSS*-QRGDEDPQIAAHVVSEANSNAASVLQWAKK  
GYTMKSNLVMLENGKQLTVKREGLYYVYTQVTFCSNREPSSQRPFIVGLWLKPSSGSERILLKANT  
HSSSQLCEQQSVHLGGVFELQAGASVFNVTASQVIHRVGFSSFGLLKL-*GGGS*-QRGDEDPQIA  
AHVVSEANSNAASVLQWAKKGYTMKSNLVMLENGKQLTVKREGLYYVYTQVTFCSNREPSSQR  
PFIVGLWLKPSSGSERILLKANTHSSSQLCEQQSVHLGGVFELQAGASVFNVTASQVIHRVGFSS  
FGLLKL-*GGGS*-QRGDEDPQIAAHVVSEANSNAASVLQWAKKGYTMKSNLVMLENGKQLTVKR  
EGLYYVYTQVTFCSNREPSSQRPFIVGLWLKPSSGSERILLKANTHSSSQLCEQQSVHLGGVFELQA  
GASVFNVTASQVIHRVGFSSFGLLKL

Supplementary Figure S2: Sequences of the immunocytokines that were developed in this study, the linker sequences are depicted in italics

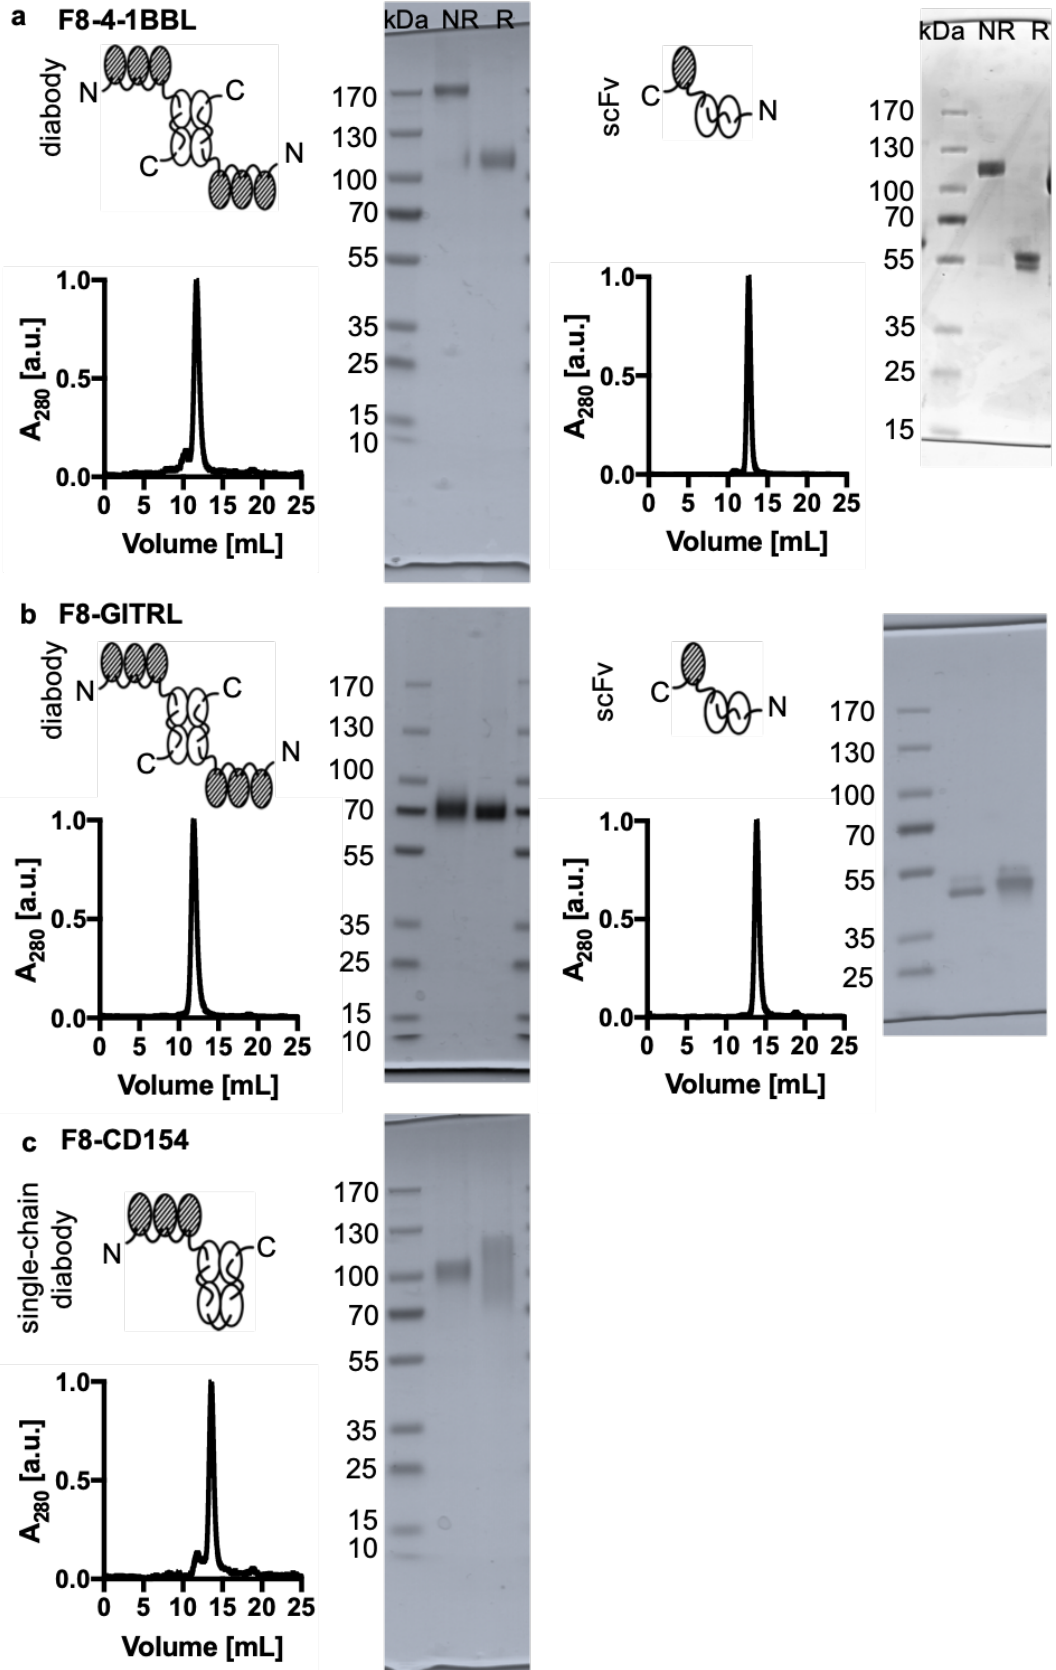

Supplementary Figure S3: The proteins were characterized by SDS PAGE (NR: non-reducing, R: reducing sample buffer) and size exclusion chromatography (Superdex 200 Increase, 10/300 GL, GE Healthcare) after purification.

|          | conventional assay |               |                | luciferase assay |               |                | mCherry expression |               |                |
|----------|--------------------|---------------|----------------|------------------|---------------|----------------|--------------------|---------------|----------------|
|          | EC <sub>50</sub>   | 95% CI        | R <sup>2</sup> | EC <sub>50</sub> | 95% CI        | R <sup>2</sup> | EC <sub>50</sub>   | 95% CI        | R <sup>2</sup> |
| L19-IL2  | 47 pM              | 26 to 83 pM   | 0.95           | 15 pM            | 8.5 to 26 pM  | 0.94           | 21 pM              | 6.3 to 74 pM  | 0.82           |
| L19-IL12 | 0.1 nM             | 0.1 to 0.2 nM | 0.99           | 3.5 nM           | 1.9 to 6.0 nM | 0.95           | 2.6 nM             | 2.0 to 3.4 nM | 0.99           |
| F8-TNF   | 0.7 pM             | 0.6 to 0.9 pM | 0.98           | 450 pM           | 280 to 730 pM | 0.96           | 540 pM             | 450 to 650 pM | 0.99           |

Supplementary Table T1: EC<sub>50</sub> obtained from a sigmoidal curve fit for conventional assay as well as for the readouts with the new cell lines (95% CI: 95% confidence interval)

|           |         | + EDA               |               |                |                    |               |                | no EDA              |               |                |                    |               |                |
|-----------|---------|---------------------|---------------|----------------|--------------------|---------------|----------------|---------------------|---------------|----------------|--------------------|---------------|----------------|
|           |         | luciferase activity |               |                | mCherry expression |               |                | luciferase activity |               |                | mCherry expression |               |                |
|           |         | EC <sub>50</sub>    | 95% CI        | R <sup>2</sup> | EC <sub>50</sub>   | 95% CI        | R <sup>2</sup> | EC <sub>50</sub>    | 95% CI        | R <sup>2</sup> | EC <sub>50</sub>   | 95% CI        | R <sup>2</sup> |
| F8-4-1BBL | diabody | 1.1 nM              | 0.9 to 1.4 nM | 0.99           | 1.2 nM             | 0.9 to 1.5 nM | 0.99           | 1.1 nM              | 0.8 to 1.5 nM | 0.98           | 1.0 nM             | 0.8 to 1.3 nM | 0.99           |
|           | scFv    | 1.1 nM              | 0.7 to 1.8 nM | 0.97           | 1.0 nM             | 0.7 to 1.6 nM | 0.98           | n/a                 | n/a           | n/a            | n/a                | n/a           | n/a            |
| F8-GITRL  | diabody | 7.6 nM              | 6.2 to 9.3 nM | 0.99           | 7.9 nM             | 7.0 to 8.9 nM | 1.00           | 4.7 nM              | 3.9 to 5.7 nM | 0.99           | 4.1 nM             | 3.6 to 4.6 nM | 1.00           |
|           | scFv    | 11 nM               | 7.5 to 18 nM  | 0.97           | 9.6 nM             | 7.5 to 12 nM  | 0.99           | 56 nM               | 43 to 72 nM   | 0.99           | 67 nM              | 57 to 79 nM   | 0.99           |
| F8-CD154  | diabody | 65 pM               | 45 to 9.3 pM  | 0.98           | 64 pM              | 49 to 85 pM   | 0.99           | 660 pM              | 0.4 to 1.1 nM | 0.97           | 1.1 nM             | 0.4 to 2.7 nM | 0.93           |

Supplementary Table T2: EC<sub>50</sub> values obtained from a sigmoidal curve fit for the different F8-TNFSF fusion proteins (95% CI: 95% confidence interval)
